# Supplementary material for: Osteogenic Induction with Silicon Hydroxyapatite Using Modified Autologous Adipose Tissue-Derived Stromal Vascular Fraction: In Vitro and Qualitative Histomorphometric Analysis
Source: MDPI journal article supplement (doi:10.3390/ma15051826), 2022-02-28
Supplement: s1 [file s1]

## Supplementary Materials:

# Osteogenic Induction with Silicon Hydroxyapatite Using Modified Autologous Adipose Tissue-Derived Stromal Vascular Fraction: In Vitro and Qualitative Histomorphometric Analysis

Muhammad Marghoob Khan <sup>1</sup>, Shadab Ahmed Butt <sup>1</sup>, Aqif Anwar Chaudhry <sup>2\*</sup>, Amir Rashid <sup>1</sup>, Kashif Ijaz <sup>2</sup>, Asifa Majeed <sup>1</sup> and Hashmat Gul <sup>1</sup>

**Table S1.** Blood complete picture of rabbits of group Group I, before and 6weeks after implantation of Si-HA.

| S. No | Specimen No | Rabbit No 1<br>0 days | After 06<br>weeks | Rabbit No 2<br>0 days | After 06<br>weeks | Rabbit No 3<br>0 days | After 06<br>weeks | Units      |
|-------|-------------|-----------------------|-------------------|-----------------------|-------------------|-----------------------|-------------------|------------|
| 1.    | RBC count   | 4.97                  | 5.90              | 3.92                  | 5.10              | 4.39                  | 4.16              | m/ $\mu$ L |
| 2.    | Hemoglobin  | 11.5                  | 13.6              | 12.2                  | 13.1              | 9.9                   | 12.4              | g/ $\mu$ L |
| 3.    | Hematocrit  | 29.5                  | 38.0              | 31.4                  | 36.0              | 26.3                  | 37.8              | %          |
| 4.    | MCV         | 59.4                  | 64.3              | 58.2                  | 66.3              | 59.8                  | 81.0              | fL         |
| 5.    | MCH         | 23.2                  | 22.1              | 25.1                  | 27.0              | 22.6                  | 24.6              | Pg         |
| 6.    | MCHC        | 39                    | 35.9              | 38.3                  | 33.4              | 37.8                  | 34.5              | g/dl       |
| 7.    | Platelets   | 253,000               | 337,000           | 201,000               | 301,000           | 359,000               | 259,000           | / $\mu$ L  |
| S. No | Specimen No | Rabbit No 4<br>0 days | After 06<br>weeks | Rabbit No 5<br>0 days | After 06<br>weeks |                       |                   |            |
| 1.    | RBC count   | 6.57                  | 3.92              | 6.02                  | 3.45              |                       |                   |            |
| 2.    | Hemoglobin  | 15.2                  | 11.4              | 14.3                  | 11.9              |                       |                   |            |
| 3.    | Hematocrit  | 39.9                  | 32.5              | 37.2                  | 32.4              |                       |                   |            |
| 4.    | MCV         | 60.7                  | 57.0              | 61.0                  | 57.9              |                       |                   |            |
| 5.    | MCH         | 23.2                  | 29.2              | 24.1                  | 24.9              |                       |                   |            |
| 6.    | MCHC        | 38.2                  | 32.1              | 38.9                  | 33.8              |                       |                   |            |
| 7.    | Platelets   | 308,000               | 279,000           | 286,000               | 254,000           |                       |                   |            |

**Table S2.** Blood complete picture of rabbits of group Group II, before and 6weeks after implantation of Si-HA.

| S. No | Specimen No | Rabbit No 1<br>0 days | After 06<br>weeks | Rabbit No 2<br>0 days | After 06<br>weeks | Rabbit No 3<br>0 days | After 06<br>weeks | Units      |
|-------|-------------|-----------------------|-------------------|-----------------------|-------------------|-----------------------|-------------------|------------|
| 1.    | RBC count   | 5.74                  | 5.12              | 5.04                  | 5.0               | 5.08                  | 3.94              | m/ $\mu$ L |
| 2.    | Hemoglobin  | 12.6                  | 11.7              | 11.8                  | 12.3              | 12.9                  | 12.9              | g/ $\mu$ L |
| 3.    | Hematocrit  | 33.1                  | 36.1              | 30.5                  | 36.9              | 41.3                  | 34.1              | %          |
| 4.    | MCV         | 57.7                  | 70.6              | 60.4                  | 72.4              | 65.8                  | 71.4              | fL         |
| 5.    | MCH         | 22.0                  | 22.9              | 23.4                  | 22.0              | 20.5                  | 24.7              | Pg         |
| 6.    | MCHC        | 38.1                  | 32.5              | 38.7                  | 31.3              | 31.2                  | 30.7              | g/dl       |
| 7.    | Platelets   | 370,000               | 104,000           | 215,000               | 333,000           | 248,000               | 257,000           | / $\mu$ L  |
| S. No | Specimen No | Rabbit No 4<br>0 days | After 06<br>weeks | Rabbit No 5<br>0 days | After 06<br>weeks |                       |                   |            |
| 1.    | RBC count   | 5.5                   | 5.12              | 5.81                  | 4.72              |                       |                   |            |
| 2.    | Hemoglobin  | 11.8                  | 10.9              | 12.2                  | 10.3              |                       |                   |            |
| 3.    | Hematocrit  | 38.5                  | 36.1              | 39.3                  | 36.8              |                       |                   |            |
| 4.    | MCV         | 69.3                  | 70.4              | 66.7                  | 75.8              |                       |                   |            |
| 5.    | MCH         | 21.3                  | 22.7              | 20.7                  | 22.0              |                       |                   |            |
| 6.    | MCHC        | 30.7                  | 32.7              | 31.0                  | 32.7              |                       |                   |            |
| 7.    | Platelets   | 247,000               | 324,000           | 399,000               | 309,000           |                       |                   |            |

**Table S3.** Blood complete picture of rabbits of group Group III, before and 6weeks after implantation of Si-HA.

| S. No | Specimen No | Rabbit No 1<br>0 days | After 06<br>weeks | Rabbit No 2<br>0 days | After 06<br>weeks | Rabbit No 3<br>0 days | After 06<br>weeks | Units      |
|-------|-------------|-----------------------|-------------------|-----------------------|-------------------|-----------------------|-------------------|------------|
| 1.    | RBC count   | 05                    | 4.2               | 4                     | 4.2               | 4.2                   | 4.1               | m/ $\mu$ L |
| 2.    | Hemoglobin  | 15                    | 12                | 16                    | 14.8              | 10.8                  | 10.3              | g/ $\mu$ L |
| 3.    | Hematocrit  | 47.5                  | 36                | 45                    | 36.2              | 30.4                  | 28.9              | %          |
| 4.    | MCV         | 90                    | 82.5              | 95                    | 82.9              | 72.3                  | 60.3              | fL         |
| 5.    | MCH         | 27                    | 26.8              | 29                    | 26.8              | 28.5                  | 25.9              | Pg         |
| 6.    | MCHC        | 33                    | 35.2              | 34                    | 34.4              | 33.99                 | 31.9              | g/dl       |
| 7.    | Platelets   | 25,0000               | 320000            | 255,000               | 30,0000           | 197,000               | 167,000           | / $\mu$ L  |
| S. No | Specimen No | Rabbit No 4<br>0 days | After 06<br>weeks | Rabbit No 5<br>0 days | After 06<br>weeks |                       |                   |            |
| 1.    | RBC count   | 4.8                   | 3.7               | 4.2                   | 3.9               |                       |                   |            |
| 2.    | Hemoglobin  | 11.5                  | 12.5              | 12.3                  | 12.9              |                       |                   |            |
| 3.    | Hematocrit  | 29.6                  | 26.6              | 26.9                  | 26.0              |                       |                   |            |
| 4.    | MCV         | 57.5                  | 53.0              | 47.8                  | 51.7              |                       |                   |            |
| 5.    | MCH         | 23.4                  | 23.9              | 21.9                  | 22.7              |                       |                   |            |
| 6.    | MCHC        | 29.6                  | 26.4              | 22.8                  | 22.8              |                       |                   |            |
| 7.    | Platelets   | 184,000               | 191,000           | 273,000               | 231,000           |                       |                   |            |

**Table S4.** Blood complete picture of rabbits of group Group IV, before and 6weeks after implantation of Si-HA.

| S. No | Specimen No | Rabbit No 1<br>0 days | After 06<br>weeks | Rabbit No 2<br>0 days | After 06<br>weeks | Rabbit No 3<br>0 days | After 06<br>weeks | Units      |
|-------|-------------|-----------------------|-------------------|-----------------------|-------------------|-----------------------|-------------------|------------|
| 1.    | WBC count   | 9,000                 | 7800              | 8500                  | 10,050            | 5300                  | 5700              | / $\mu$ L  |
| 2.    | RBC count   | 5.5                   | 4.2               | 4.8                   | 4.7               | 4.1                   | 4.9               | m/ $\mu$ L |
| 3.    | Hemoglobin  | 16                    | 15.2              | 13.8                  | 16                | 13.4                  | 13.8              | g/ $\mu$ L |
| 4.    | Hematocrit  | 47                    | 42.8              | 47                    | 43.9              | 37.2                  | 38.8              | %          |
| 5.    | MCV         | 84                    | 18.8              | 79.7                  | 92                | 79.7                  | 77.7              | fL         |
| 6.    | MCH         | 30                    | 30.2              | 29.3                  | 27.6              | 28.7                  | 28.7              | Pg         |
| 7.    | MCHC        | 31.5                  | 32.5              | 33.3                  | 33                | 35.9                  | 37.0              | g/dl       |
| 8.    | Platelets   | 212,000               | 224,000           | 235,000               | 420,000           | 101,000               | 231,000           | / $\mu$ L  |
| S. No | Specimen No | Rabbit No 4<br>0 days | After 06<br>weeks | Rabbit No 5<br>0 days | After 06<br>weeks |                       |                   |            |
| 1.    | WBC count   | 6900                  | 4900              | 7800                  | 10800             |                       |                   |            |
| 2.    | RBC count   | 3.4                   | 3.8               | 3.9                   | 3.9               |                       |                   |            |
| 3.    | Hemoglobin  | 11.9                  | 11.5              | 11.3                  | 13.3              |                       |                   |            |
| 4.    | Hematocrit  | 34.3                  | 34.7              | 32.0                  | 32.8              |                       |                   |            |
| 5.    | MCV         | 78.3                  | 80.7              | 78.0                  | 78.7              |                       |                   |            |
| 6.    | MCH         | 22.3                  | 23.5              | 22.9                  | 26.5              |                       |                   |            |
| 7.    | MCHC        | 38.0                  | 37.0              | 38.9                  | 36.3              |                       |                   |            |
| 8.    | Platelets   | 243,000               | 216,000           | 273,000               | 291,000           |                       |                   |            |
